# Supplementary material for: The Association between Dietary Patterns and Pre-Pregnancy BMI with Gestational Weight Gain: The “Born in Shenyang” Cohort
Source: MDPI journal article supplement (doi:10.3390/nu14122551), 2022-06-20
Supplement: s1 [file s1]

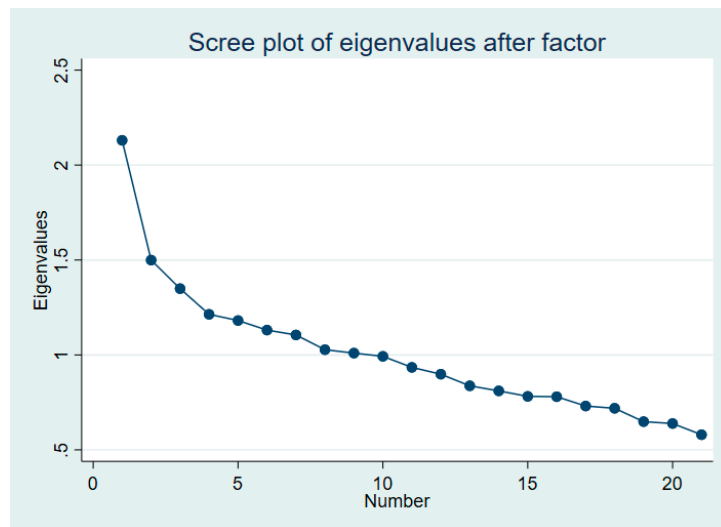

**Figure S1.** Scree plot from exploratory factor analysis.

**Table S1.** Complete list of the 21 food groups.

| <b>Food group</b>          | <b>Food items</b>                                                                                                                                                   |
|----------------------------|---------------------------------------------------------------------------------------------------------------------------------------------------------------------|
| Rice                       | Rice, rice flour                                                                                                                                                    |
| Wheat flour and products   | Noodle, bread, bun, flour, steamed twisted roll                                                                                                                     |
| Whole grains               | Brown rice, millet, sorghum, black rice                                                                                                                             |
| Tubers                     | Potatoes, sweet potatoes,                                                                                                                                           |
| Red meat                   | Pork, pork ribs, pork fat, beef, lamb, donkey, rabbit                                                                                                               |
| Poultry                    | Chicken, duck, goose                                                                                                                                                |
| Organ meats                | Liver, kidney, blood, large intestine                                                                                                                               |
| Freshwater fish            | Carp, squid, grass carp, chub, catfish                                                                                                                              |
| Marine fish                | Hair tail, yellow croaker, squid, herring, striped bass                                                                                                             |
| Shrimps, crabs and mussels | Shrimp, crab, scallop, oyster                                                                                                                                       |
| Seaweed                    | Fresh or dried seaweed                                                                                                                                              |
| Milk                       | Cow milk, goat milk                                                                                                                                                 |
| Dairy products             | Yogurt, cheese                                                                                                                                                      |
| Eggs                       | Egg, duck egg, goose egg                                                                                                                                            |
| Beans and bean products    | Broad bean, soy, tofu, dried tofu, soy milk                                                                                                                         |
| Fruits                     | Apple, pear, orange, banana, grape, peach, watermelon, cherry, jujube                                                                                               |
| Vegetables                 | Spinach, cabbage, Chinese cabbage, celery, rape, oil wheat, western lettuce, chives, tomato, cucumber, carrot, winter melon, onion, green paper, broccoli, mushroom |
| Nuts                       | Peanut, walnut, sesame, cashew, almond, sunflower seed, pistachio                                                                                                   |
| Pastry and candy           | Jelly, jam, chocolate, honey, sugar, candy, mooncake                                                                                                                |
| Fried foods                | Chips, French fries, fritters, fried chickens, fried fish                                                                                                           |
| Sweet beverages            | Coke, soda, fruit juice, soft drinks                                                                                                                                |

**Table S2.** Characteristics of participants included and excluded in the present analysis

| Characteristics                                          | Participants, n (%) |            | P value |
|----------------------------------------------------------|---------------------|------------|---------|
|                                                          | Included            | Excluded   |         |
| Age at enrollments (years)                               |                     |            | <0.01   |
| <25                                                      | 60 (5.9)            | 12 (4.4)   |         |
| 25-29                                                    | 450 (43.9)          | 96 (35.6)  |         |
| 30-34                                                    | 358 (34.9)          | 92 (34.1)  |         |
| ≥35                                                      | 158 (15.4)          | 70 (25.9)  |         |
| Ethnicity                                                |                     |            | <0.01   |
| Han                                                      | 855 (83.3)          | 193 (71.5) |         |
| Others                                                   | 171 (16.7)          | 77 (28.5)  |         |
| Educational attainment                                   |                     |            | 0.13    |
| High school or below                                     | 241 (23.5)          | 66 (28.2)  |         |
| College or above                                         | 785 (76.5)          | 168 (71.8) |         |
| Household income per year, CNY                           |                     |            | 0.37    |
| <50,000                                                  | 544 (53.0)          | 482 (47.0) |         |
| ≥50,000                                                  | 126 (48.5)          | 255 (45.7) |         |
| Parity                                                   |                     |            | 0.38    |
| Primipara                                                | 795 (77.5)          | 175 (75.8) |         |
| Multipara                                                | 231 (22.5)          | 59 (25.2)  |         |
| Pre-pregnancy BMI category, kg/m <sup>2</sup>            |                     |            | 0.21    |
| <18.5                                                    | 134 (13.1)          | 32 (13.7)  |         |
| 18.5-~25.0                                               | 700 (68.2)          | 147 (62.8) |         |
| ≥25.0                                                    | 192 (18.7)          | 55 (23.5)  |         |
| Smoking during or before pregnancy                       |                     |            | <0.01   |
| No                                                       | 1020 (99.4)         | 232 (85.9) |         |
| Yes                                                      | 6 (0.6)             | 38 (14.7)  |         |
| Physical activity status during pregnancy, MET-hour/week |                     |            | 0.01    |
| <100                                                     | 266 (25.9)          | 96 (35.6)  |         |
| 100-200                                                  | 556 (54.2)          | 124 (45.9) |         |
| >200                                                     | 204 (19.9)          | 50 (18.5)  |         |
| Energy intake, kcal/d                                    |                     |            | 0.78    |
| <2100                                                    | 619 (60.3)          | 407 (40.0) |         |
| ≥2100                                                    | 74 (61.7)           | 46 (38.3)  |         |

CNY: Chinese Yuan, BMI: body mass index, MET: metabolic equivalent

**Table S3.** Crude and adjusted odds ratios for being EGWG by the quartiles of dietary pattern scores, further adjusted for pre-pregnancy BMI status.

| Dietary patterns         | Risk of Being EGWG (ref. = Non-EGWG, n = 1026) |                  |                  |                  | <i>P</i> for trend |
|--------------------------|------------------------------------------------|------------------|------------------|------------------|--------------------|
|                          | Q1<br>Reference                                | Q2 OR<br>(95%CI) | Q3 OR<br>(95%CI) | Q4 OR<br>(95%CI) |                    |
| Traditional pattern      | 1.00                                           | 1.06 (0.73,1.54) | 1.62 (1.10,2.40) | 1.67 (1.04,2.67) | 0.02               |
| Sweet foods pattern      | 1.00                                           | 0.66 (0.46,0.95) | 1.03 (0.71,1.49) | 0.94 (0.65,1.37) | 0.79               |
| High protein pattern     | 1.00                                           | 0.66 (0.46,0.96) | 0.56 (0.38,0.81) | 0.67 (0.46,0.99) | 0.10               |
| Milk-nut-seafood pattern | 1.00                                           | 0.83 (0.58,1.20) | 0.94 (0.65,1.37) | 1.04 (0.70,1.53) | 0.64               |

Adjusted for other dietary pattern score, age, parity, family income, education level, ethnicity, smoking status, total energy intake per day, physical activity status per week, pre-pregnancy BMI status.

EGWG: excess gestational weight gain, BMI: body mass index, Q1: quartile 1; Q2: quartile 2; Q3: quartile 3; Q4: quartile 4; OR: odd ratio; CI: confidence interval.

**Table S4.** Associations of maternal dietary pattern scores, in quartiles, with gestational weight gain rate

| Dietary patterns         | Gestational Weight Gain Rate (kg/w, n = 1026) |                       |                       |                       | <i>P</i> for trend |
|--------------------------|-----------------------------------------------|-----------------------|-----------------------|-----------------------|--------------------|
|                          | Q1<br>Reference                               | Q2<br>$\beta$ (95%CI) | Q3<br>$\beta$ (95%CI) | Q4<br>$\beta$ (95%CI) |                    |
| Traditional pattern      | 1.00                                          | 0.01 (-0.01, 0.04)    | 0.02 (-0.01, 0.04)    | 0.02 (-0.01, 0.05)    | 0.28               |
| Sweet foods pattern      | 1.00                                          | -0.02 (-0.04, 0.01)   | 0.01 (-0.01, 0.03)    | -0.01 (-0.03, 0.02)   | 0.85               |
| High protein pattern     | 1.00                                          | -0.03 (-0.05, -0.01)  | -0.03 (-0.06, -0.01)  | -0.03 (-0.06, -0.01)  | 0.04               |
| Milk-nut-seafood pattern | 1.00                                          | -0.02 (-0.04, 0.00)   | -0.03 (-0.05, 0.00)   | -0.01 (-0.04, 0.01)   | 0.45               |

Adjusted for other dietary pattern score, age, parity, family income, education level, ethnicity, smoking status, total energy intake per day, physical activity status per week, pre-pregnancy BMI status.

BMI: body mass index, Q1: quartile 1; Q2: quartile 2; Q3: quartile 3; Q4: quartile 4; CI: confidence interval.
